# Supplementary material for: Glutathione-capped, renal-clearable CuS nanodots for photoacoustic imaging and photothermal therapy
Source: Royal Society of Chemistry journal article supplement (doi:10.1039/c7tb01517h), 2017-01-01
Supplement: c7tb01517h1.pdf [file c7tb01517h1.pdf]

## Supporting information

# Glutathione-capped, renal-clearable CuS nanodots for photoacoustic imaging and photothermal therapy

Guohai Liang<sup>†a\*</sup>, Xudong Jin<sup>†a</sup>, Huan Qin<sup>a</sup>, and Da Xing<sup>a\*</sup>

*MOE Key Laboratory of Laser Life Science & Institute of Laser Life Science, College of Biophotonics, South China Normal University, Guangzhou 510631, China.*

E-mail: Lianguoh@scnu.edu.cn, E-mail: xingda@scnu.edu.cn

### Table of Contents:

1. Fig. S1 Influence of reaction time on the absorption peak intensity of GSH-CuS nanodots.
2. Fig. S2 XRD pattern of GSH-CuS nanodots.
3. Fig. S3 TEM image of GSH-CuS nanodots acquired at the reaction time of 15 min.
4. Fig. S4 FT-IR spectra of GSH and GSH-CuS NDs.
5. Fig. S5 UV-vis-NIR absorption spectra of aqueous solutions of GSH-CuS nanodots at varied Cu concentrations.
6. Fig. S6 TEM image and hydrodynamic size analysis of PVP-coated CuS nanodots.
7. Fig. S7 Comparison of NIR absorption properties between GSH-CuS nanodots and PVP-coated CuS nanodots.
8. Fig. S8 Temperature evolution curves of GSH-CuS NDs in a laser on/off cycle.
9. Fig. S9 Colloidal Stability of GSH-CuS NDs in different buffers.
10. Fig. S10 Agarose gel electrophoresis of GSH-CuS nanodots with or without incubation with fetal bovine serum.
11. Fig. S11 Blood biochemical assay and hematology analysis.
12. Fig. S12 Histological changes of healthy mice at 48 h after injection of saline or GSH-CuS NDs.
13. Fig. S13 Longitudinal ( $r_1$ ) and transverse ( $r_2$ ) relaxivity curves of GSH-CuS nanodots at 3.0 T.
14. Estimation of the photothermal conversion efficiency of GSH-CuS NDs.

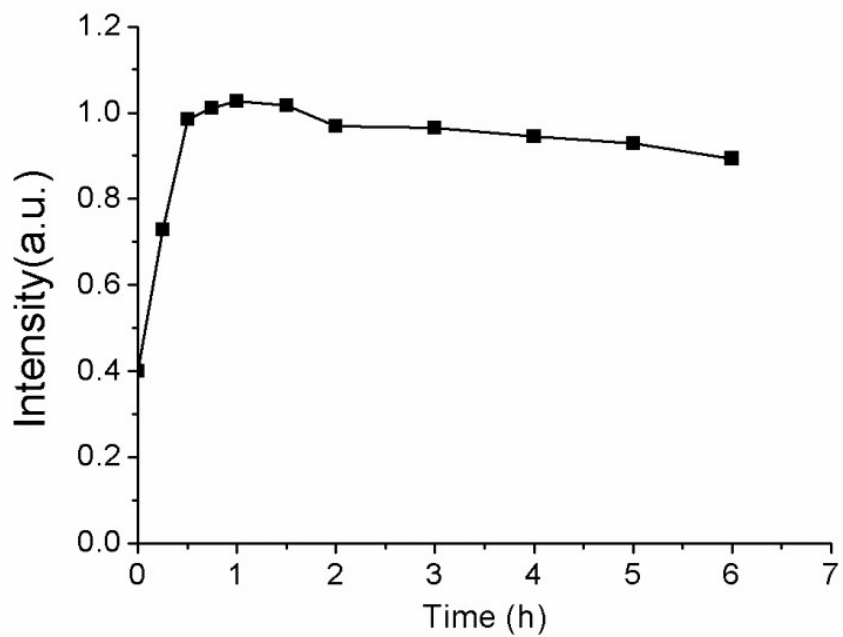

Fig. S1 Influence of reaction time on the absorption peak intensity of GSH-CuS nanodots.

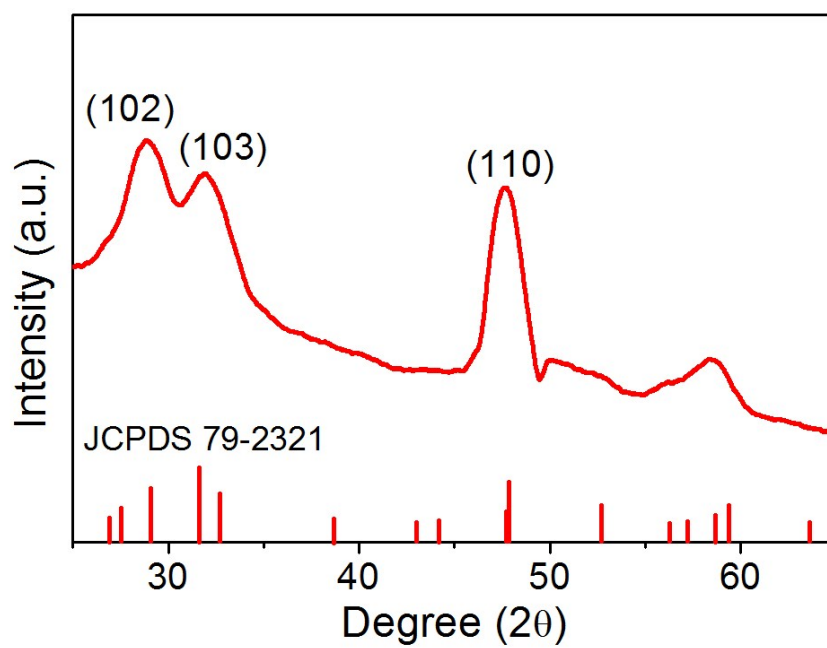

Fig. S2 XRD pattern of GSH-CuS nanodots.

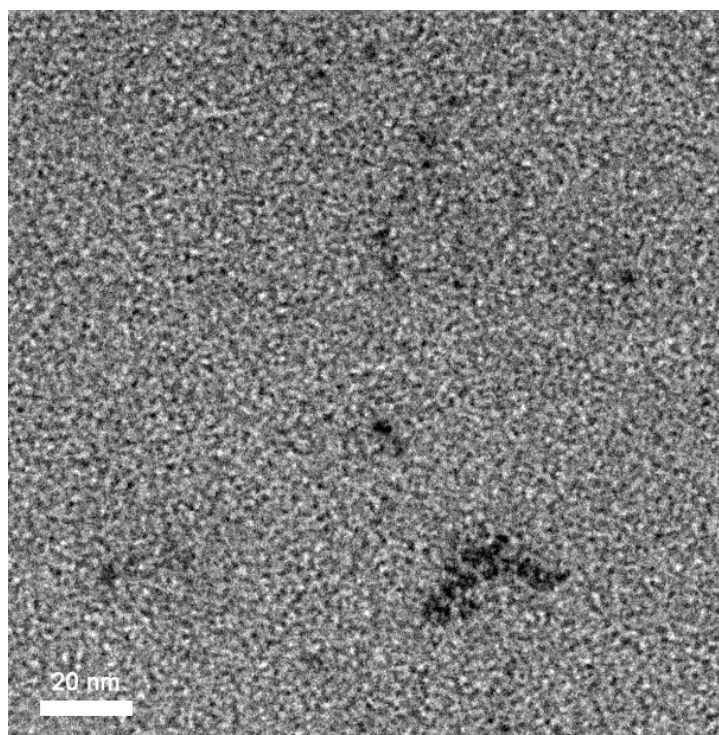

Fig. S3 TEM image of GSH-CuS nanodots acquired at the reaction time of 15 min.

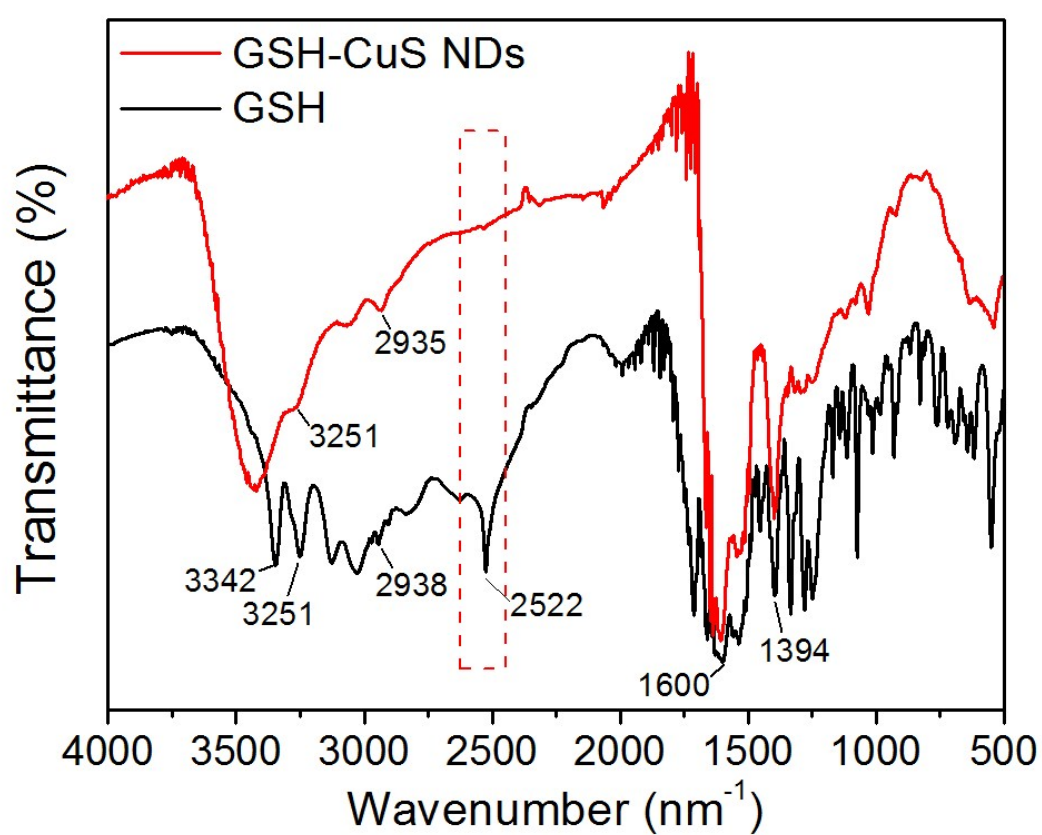

Fig. S4 FT-IR spectra of GSH and GSH-CuS NDs. The peaks at  $\sim 3251$  cm<sup>-1</sup>,  $2935$  cm<sup>-1</sup> and  $2522$  cm<sup>-1</sup> can be attributed to the stretching vibrations of N-H, C-H and S-H, respectively. The peaks at

$\sim 1600\text{ cm}^{-1}$  and  $1394\text{ cm}^{-1}$  are in accordance with the vibrations of C-N and N-H band, respectively.

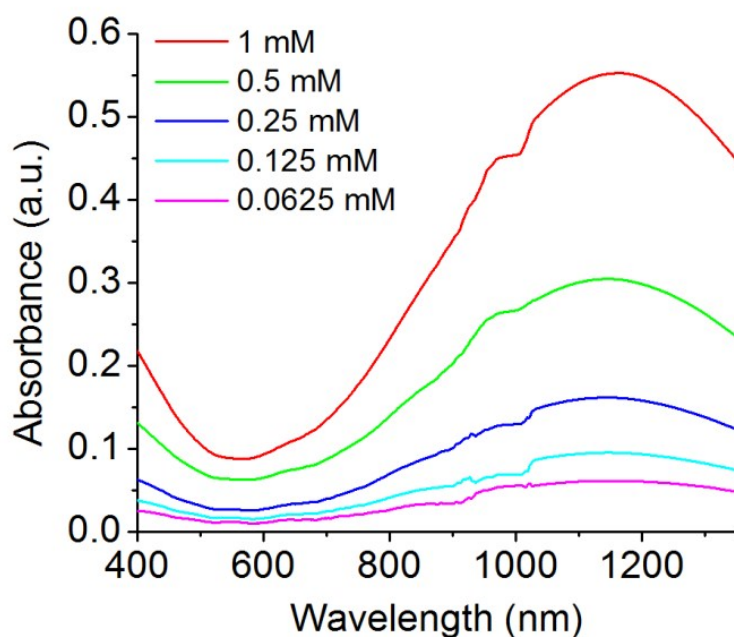

Fig. S5 UV-vis-NIR absorption spectra of aqueous solutions of GSH-CuS nanodots at varied Cu concentrations.

A

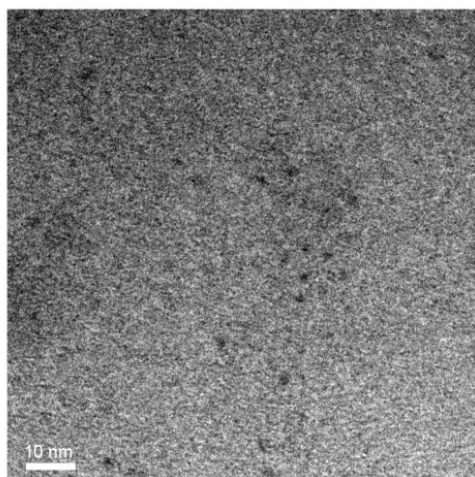

B

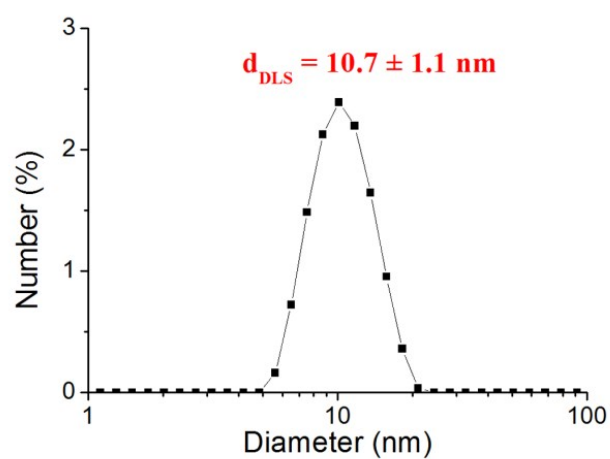

Fig. S6 TEM image (A) and hydrodynamic size analysis (B) of PVP-coated CuS nanodots.

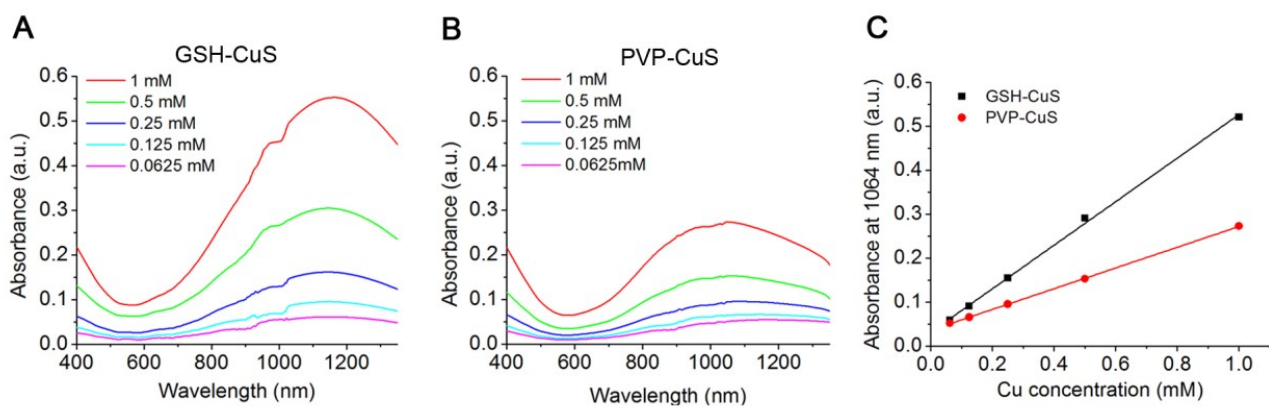

Fig. S7 Comparison of NIR absorption properties between GSH-CuS nanodots and PVP-coated CuS nanodots. (A, B) UV-vis-NIR absorption spectra of aqueous solutions of GSH-CuS nanodots (A) and PVP-coated CuS nanodots (B) at varied Cu concentrations. (C) Absorption intensities at 1064 nm of the samples.

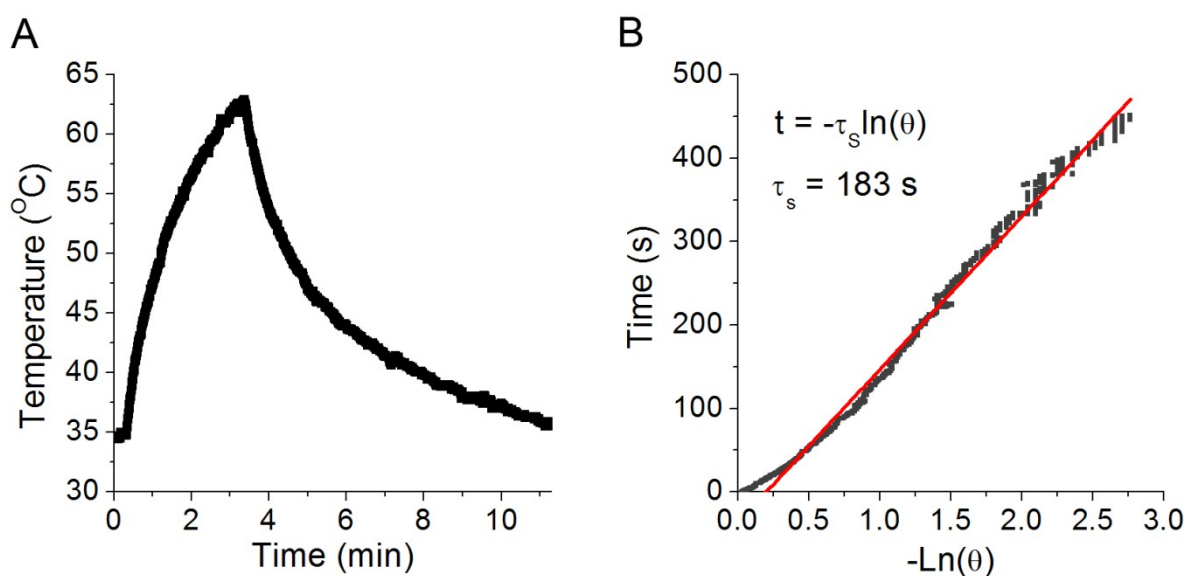

Fig. S8 Temperature evolution curves of GSH-CuS NDs in a laser on/off cycle. (A) Temperature profile of GSH-CuS NDs (0.5 mM Cu) under the irradiation of an NIR laser (980 nm, 3.0 W cm<sup>-2</sup>) for 3 min and then the laser was turned off. (B) Plot of the cooling time *versus* -ln( $\theta$ ) obtained from the cooling stage in (A).



A

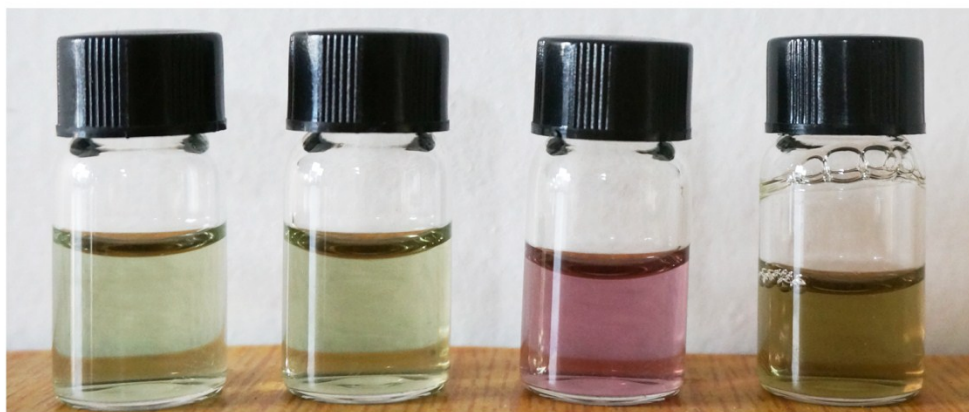

B

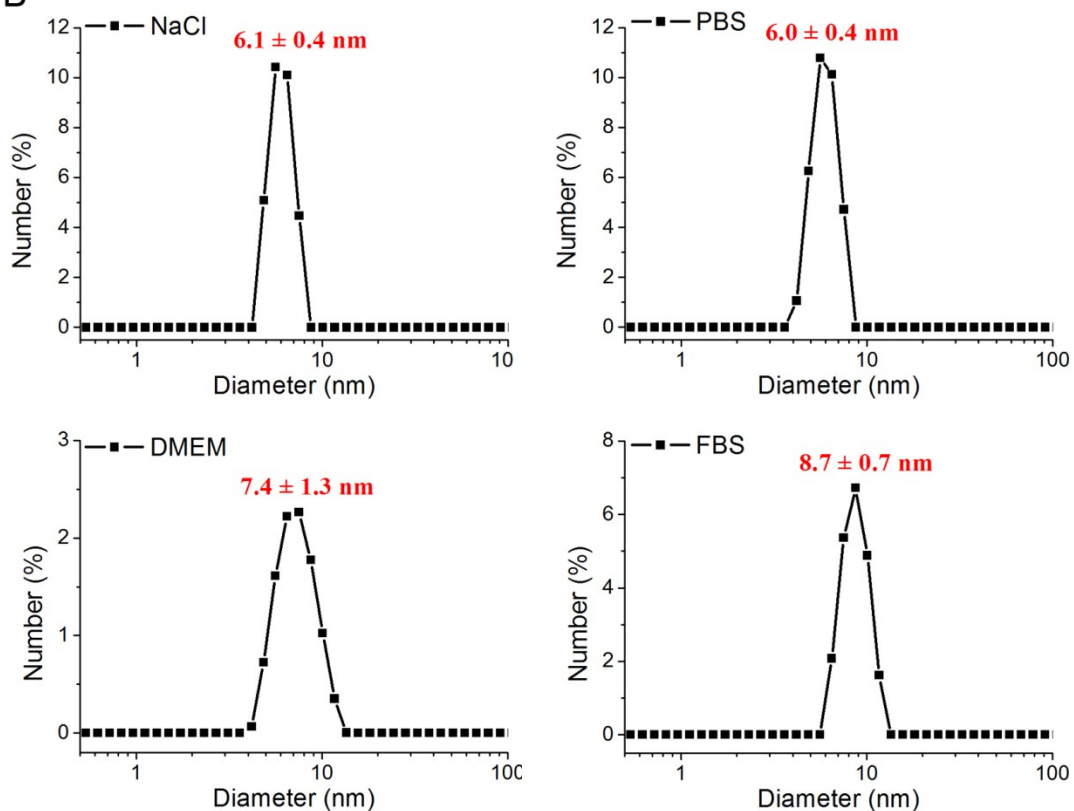

Fig. S9 Colloidal Stability of GSH-CuS NDs in different buffers. (A) Photographs of GSH-CuS nanodots in (from left to right) NaCl, PBS, 50% (v/v) Dulbecco's modified Eagle growth media (DMEM), and 25% (v/v) fetal bovine serum (FBS). (B) hydrodynamic size analysis of GSH-CuS NDs in different buffers.

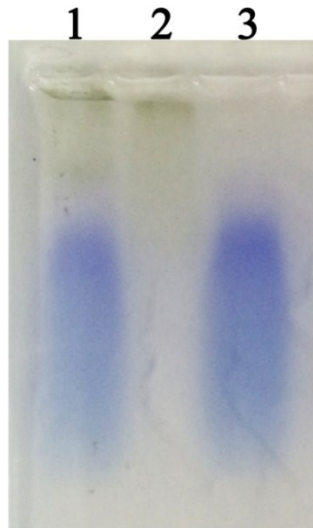

Fig. S10 Agarose gel electrophoresis of GSH-CuS nanodots with (Lane 1) or without (Lane 2) incubation with fetal bovine serum (FBS). Lane 3 was loaded with FBS alone as a control sample. The nanodots were incubated with 25% (v/v) FBS at room temperature for 1 h before loading on the gel. Serum proteins were stained by Coomassie brilliant blue 250.

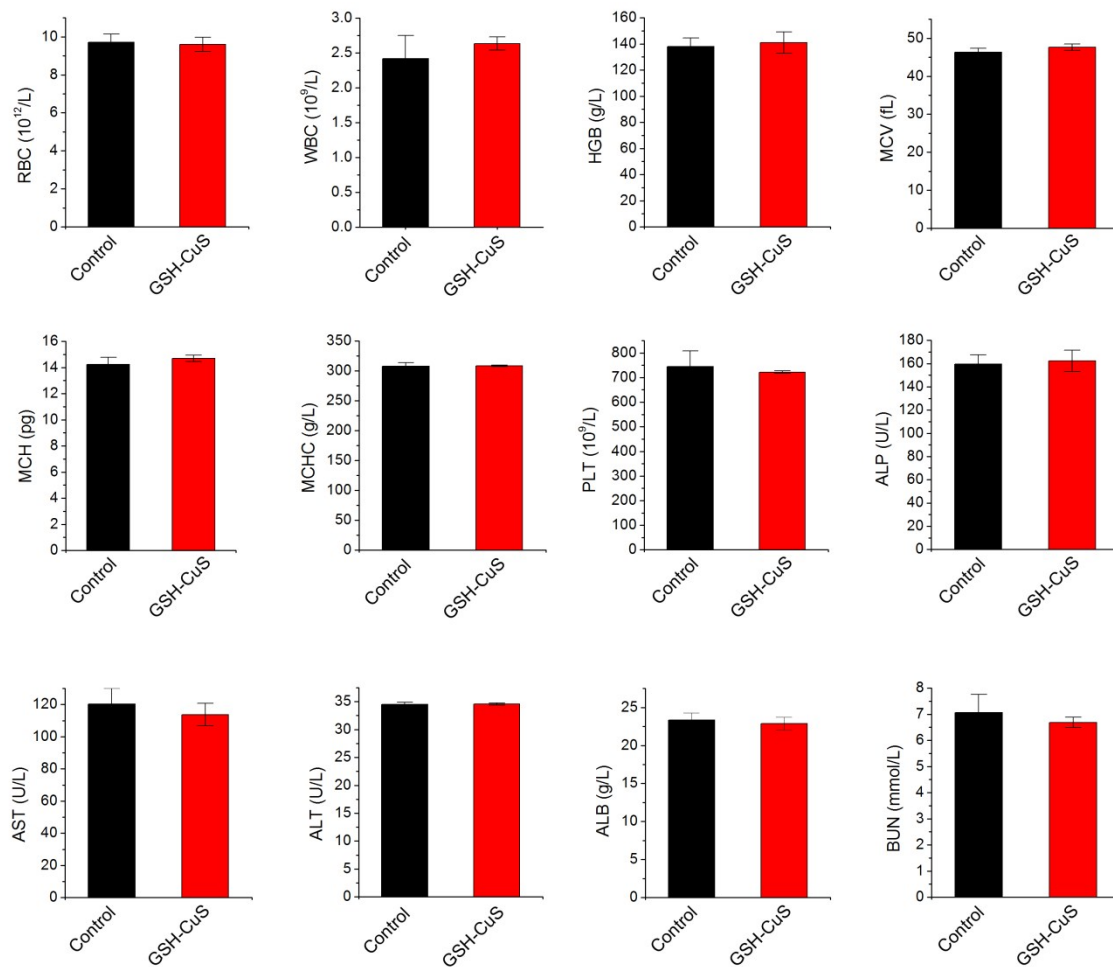

Fig. S11 Blood biochemical assay and hematology analysis.

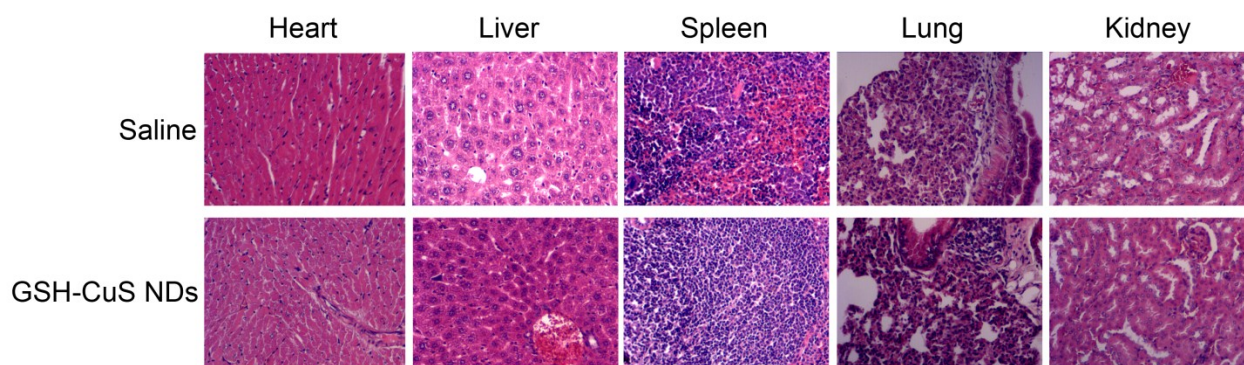

Fig. S12 Histological changes of healthy mice at 48 h after injection of saline or GSH-CuS NDs (dose =7.86 mg/kg).

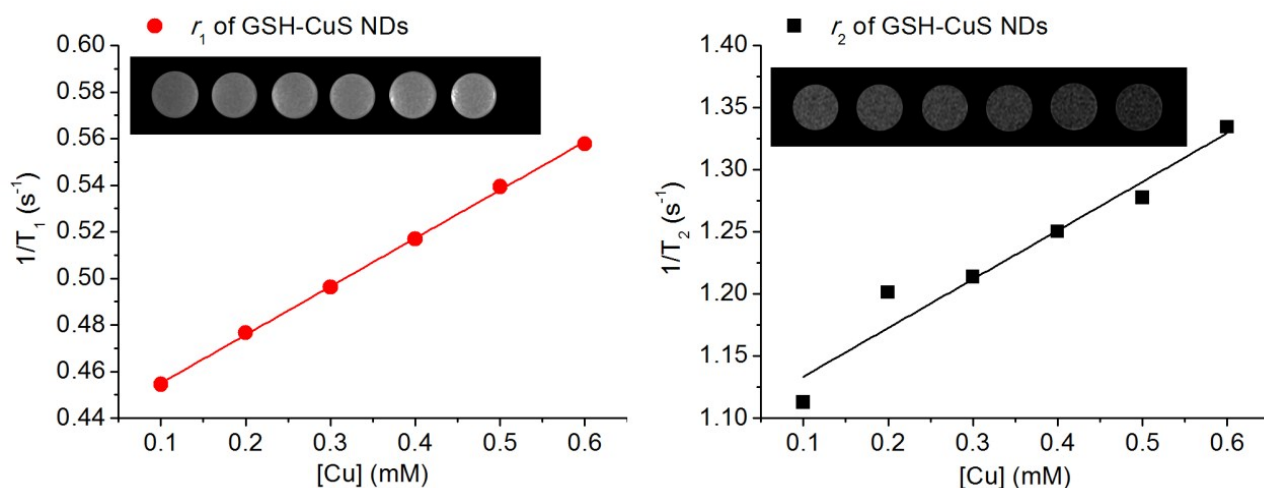

Fig. S13 Longitudinal ( $r_1$ ) and transverse ( $r_2$ ) relaxivity curves of GSH-CuS nanodots at 3.0 T. Samples with various Cu<sup>2+</sup> concentrations (determined by ICP-AES) were used for measurements on a 3T MR scanner (TrioTim, Siemens, Germany) with a head coil at 25 °C.  $T_1$  was measured with an IR sequence with a TR of 9000 ms, TE of 13 ms, and 10 inversion recovery points (TI = 24, 100, 200, 400, 600, 900, 1200, 2000, 3000, and 5000 ms). The acquired images had a FOV of 107 mm × 179 mm and a slice thickness of 5 mm.  $T_2$  relaxometry was performed using a multi-echo SE sequence with a TR of 3000 ms and employing 10 TE values (27, 40.5, 54, 67.5, 81, 94.5, 108, 121.5, 135, 148.5 ms).



### Photothermal Conversion Efficiency

The photothermal conversion efficiency was determined according to the following equation (1):<sup>1, 2</sup>

$$\eta = \frac{hS(T_{max} - T_{amb}) - Q_{dis}}{I(1 - 10^{-A_{980}})} \quad (1)$$

Where  $h$ ,  $S$ ,  $T_{max}$ ,  $T_{amb}$ ,  $Q_{dis}$ ,  $I$ , and  $A_{980}$  were the heat transfer coefficient, the surface area of the container, the equilibrium temperature, the ambient temperature, the heat dissipation from the light absorbed by the quartz sample cell, the laser power, and the absorbance of the GSH-CuS NDs at 980 nm, respectively.  $hS$  was obtained by equation (2):

$$hS = \frac{m_w C_w}{\tau_s} \quad (2)$$

Where  $m_w$  and  $C_w$  were the mass (1g) and heat capacity (4.2 J g<sup>-1</sup>) of water used as the solvent, respectively.  $\tau_s$  was the sample system time constant, which could be estimated from plot of the cooling time *versus*  $-\ln(\theta)$  shown in Fig. S8, where  $\theta$  was the dimensionless driving force temperature, which could be defined as

$$\theta = \frac{(T - T_{amb})}{(T_{max} - T_{amb})} \quad (3)$$

$A_{980}$  was determined to be 0.255 from Fig. S5 for a GSH-CuS NDs sample (0.5 mM Cu). The  $Q_{dis}$  was measured independently using a quartz cuvette cell containing pure water, and was determined to be 0.362 W. Temperature increased in this experiment from an ambient value of  $T_{amb} = 34.3$  °C to a maximum value of  $T_{max} = 62.8$  °C after laser irradiation, and then the laser was shut off, and the sample was allowed to cool, returning to a value of  $T_{amb} = 34.3$  °C. Therefore the photothermal conversion efficiency of GSH-CuS NDs at 980 nm was calculated to be 21.9%.

### REFERENCES

1. D. K. Roper, W. Ahn and M. Hoepfner, *J. Phys. Chem. C*, 2007, **111**, 3636-3641.
2. S.-M. Zhou, D.-K. Ma, S.-H. Zhang, W. Wang, W. Chen, S.-M. Huang and K. Yu, *Nanoscale*, 2016, **8**, 1374-1382.
